# Supplementary material for: On residual stresses and homeostasis: an elastic theory of functional adaptation in living matter
Source: PubMed Central journal article supplement (PMC4845028; doi:10.1038/srep24390), 2016-04-26
Supplement: srep24390-s1.pdf [file srep24390-s1.pdf]

On residual stresses and homeostasis:  
an elastic theory of functional adaptation in living  
matter

P. Ciarletta<sup>1,2,\*</sup>, M. Destrade<sup>3</sup> and A.L. Gower<sup>3,4</sup>

<sup>1</sup> Sorbonne Universités, UPMC Univ Paris 06,  
CNRS, UMR 7190, Institut Jean Le Rond d'Alembert,  
F-75005 Paris, France

<sup>2</sup> MOX and Fondazione CEN, Politecnico di Milano,  
P.za Leonardo da Vinci 32, 20133 Milano, Italy

<sup>3</sup> School of Mathematics, Statistics and Applied Mathematics,  
National University of Ireland Galway,  
University Road, Galway, Ireland

<sup>4</sup> School of Mathematics, University of Manchester,  
Oxford road, Manchester, M13 9PL, UK

\* Corresponding author: [pasquale.ciarletta@polimi.it](mailto:pasquale.ciarletta@polimi.it)

# Supplemental Material

## 1 Derivation of a constitutive equation for elastic bodies with residual stresses

Under the assumptions of a macroscopic length-scale at the tissue scale and a characteristic time-scale short enough to neglect dissipative effects on the residual stresses (e.g. ageing phenomena), it is possible to define an elastic free energy  $\Psi = \Psi(\mathbf{F}, \boldsymbol{\tau})$ . Since we neglect any material anisotropy within the material (e.g. fiber reinforcement), we postulate that  $\Psi$  is a scalar-valued function depending on ten invariants: the six principal invariants of  $\mathbf{C}$  and  $\boldsymbol{\tau}$ , and the four combined invariants of  $\mathbf{C}$  and  $\boldsymbol{\tau}$ . From standard thermo-mechanical arguments, the constitutive equation of the Cauchy stress can be expressed as:

$$\boldsymbol{\sigma} = \mathbf{F} \frac{\partial \Psi}{\partial \mathbf{F}}(\mathbf{F}, \boldsymbol{\tau}) = \mathbf{F} \left( \sum_{k=1}^3 \frac{\partial \Psi}{\partial I_{Ck}} \frac{\partial I_{Ck}}{\partial \mathbf{F}} + \sum_{m=1}^4 \frac{\partial \Psi}{\partial J_m} \frac{\partial J_m}{\partial \mathbf{F}} \right) \quad (\text{S1})$$

where the chain differentiation rule has been used. Recalling the following tensor rules:

$$\frac{\partial I_{C1}}{\partial \mathbf{F}} = 2\mathbf{F}^T; \quad \frac{\partial I_{C2}}{\partial \mathbf{F}} = 2I_{C1}\mathbf{F}^T + \mathbf{C}\mathbf{F}^T; \quad \frac{\partial I_{C3}}{\partial \mathbf{F}} = 2I_{C3}\mathbf{F}^{-1} \quad (\text{S2})$$

$$\frac{\partial J_1}{\partial \mathbf{F}} = 2\boldsymbol{\tau}\mathbf{F}^T; \quad \frac{\partial J_2}{\partial \mathbf{F}} = 2\boldsymbol{\tau}\mathbf{C}\mathbf{F}^T + 2\mathbf{C}\boldsymbol{\tau}\mathbf{F}^T; \quad \frac{\partial J_3}{\partial \mathbf{F}} = 2\boldsymbol{\tau}^2\mathbf{F}^T; \quad \frac{\partial J_4}{\partial \mathbf{F}} = 2\boldsymbol{\tau}^2\mathbf{C}\mathbf{F}^T + 2\mathbf{C}\boldsymbol{\tau}^2\mathbf{F}^T \quad (\text{S3})$$

it is possible to derive the Equation (3) of the Letter. It is useful to highlight that the constitutive equation for a compressible material can easily be obtained by removing the Lagrange multiplier  $p$  and postulating a functional dependence of the free energy on  $I_{C3}$ .

## 2 Derivation of the initial stress symmetry conditions

The *initial stress symmetry* (ISS) enforces the necessity to recover the residually stressed configuration from the loaded state by reversing the deformation mapping:

$$\boldsymbol{\tau} = -p_\tau \mathbf{I} + \mathbf{F}^{-1} \frac{\partial \Psi}{\partial \mathbf{F}}(\mathbf{F}^{-1}, \boldsymbol{\sigma}) \quad (\text{S4})$$

where  $p_\tau$  is the Lagrange multiplier due to the incompressibility constraint. Hereafter we show that the ISS conditions in Eq. (S4) can be expressed as a set of scalar equations, relating the free energy density  $\Psi(\mathbf{F}, \boldsymbol{\tau})$  and the invariants of  $\boldsymbol{\tau}$  and  $\mathbf{C}$ . Let us first use Eq. (S4) to write the residual stress as

$$\begin{aligned} \boldsymbol{\tau} = & -p_\tau \mathbf{I} + 2\Psi_{,I_1}^\sigma \mathbf{C}^{-1} + 2\Psi_{,I_2}^\sigma (I_2 \mathbf{C}^{-1} - \mathbf{C}^{-2}) + 2\Psi_{,J_1}^\sigma \mathbf{F}^{-1} \boldsymbol{\sigma} \mathbf{F}^{-T} + 2\Psi_{,J_3}^\sigma \mathbf{F}^{-1} \boldsymbol{\sigma}^2 \mathbf{F}^{-T} \\ & + 2\Psi_{,J_2}^\sigma \mathbf{F}^{-1} (\boldsymbol{\sigma} \mathbf{B}^{-1} + \mathbf{B}^{-1} \boldsymbol{\sigma}) \mathbf{F}^{-T} + 2\Psi_{,J_4}^\sigma \mathbf{F}^{-1} (\boldsymbol{\sigma}^2 \mathbf{B}^{-1} + \mathbf{B}^{-1} \boldsymbol{\sigma}^2) \mathbf{F}^{-T} \end{aligned} \quad (\text{S5})$$

where  $\Psi_{,I_k}^\sigma := \Psi_{,I_k}(\mathbf{F}^{-1}, \boldsymbol{\sigma})$ ,  $\Psi_{,J_m}^\sigma := \Psi_{,J_m}(\mathbf{F}^{-1}, \boldsymbol{\sigma})$ ,  $I_1 = \text{tr}(\mathbf{C})$ ,  $I_2 = \text{tr}(\mathbf{C}^{-1})$  using the Cayley-Hamilton theorem with  $\det \mathbf{C} = 1$ , and comma denotes partial derivative with respect to the following term. The above must hold for every  $\boldsymbol{\tau}$  and  $\mathbf{C}$ . Thus, we can substitute the constitutive equation for the Cauchy stress into Eq. (S5), obtaining :

$$\alpha_{ijkmn} \mathbf{C}^i \boldsymbol{\tau}^j \mathbf{C}^k \boldsymbol{\tau}^m \mathbf{C}^n = \mathbf{0}, \quad (\text{S6})$$

where we assume summation for  $i, k, n$  over  $\{-2, -1, 0, 1, 2\}$  and  $j, m$  over  $\{0, 1, 2\}$ . Dealing with symmetric tensors, we have the symmetries  $\alpha_{ijkmn} = \alpha_{njkmi} = \alpha_{nmkji}$ , where the values of  $\alpha_{ijkmn}$  are not reported here for the sake of brevity.

Finally, it is possible to further simplify Eq. (S6) to obtain nine scalar equations that hold for any choice of  $\Psi$  and of all the invariants. This can be done by varying  $\mathbf{C}$  and  $\boldsymbol{\tau}$  while

keeping the invariants fixed. Since Eq.(S6) must hold for any  $\mathbf{C}$  and  $\boldsymbol{\tau}$ , we obtain nine scalar equations which compactly rewrite

$$\mathbf{b} + \mathbf{P}^{\{1\}}\Psi_{,J_1}^\sigma + \mathbf{P}^{\{2\}}\Psi_{,J_2}^\sigma + \Psi_{,J_n} \left( \mathbf{P}^{\{3\}}\Psi_{,J_3}^\sigma + \mathbf{P}^{\{4\}}\Psi_{,J_4}^\sigma \right) = 0, \quad (\text{S7})$$

$$\Psi_{J_n} \left( \mathbf{Q}^{\{1\}}\Psi_{,J_1}^\sigma + \mathbf{Q}^{\{2\}}\Psi_{,J_2}^\sigma + \mathbf{Q}^{\{3\}}\Psi_{,J_3}^\sigma + \mathbf{Q}^{\{4\}}\Psi_{,J_4}^\sigma \right) = 0, \quad (\text{S8})$$

where  $n$  sums over  $\{0, 1, 2, 3, 4\}$ ,  $\Psi_{J_0} := 1$ , and:

$$\mathbf{b} = \begin{bmatrix} 2\Psi_{,I_2}^\sigma \\ -2\Psi_{,I_1}^\sigma \\ p_\tau \\ 0 \\ 0 \\ 1 \end{bmatrix}, \quad \mathbf{P}^{\{1\}} = 4 \begin{bmatrix} \Psi_{I_2} \\ p/2 \\ -\Psi_{,I_1} \\ -2\Psi_{,J_2} \\ 2I_2\Psi_{,J_2} \\ -\Psi_{,J_1} - 2I_1\Psi_{,J_2} \end{bmatrix}, \quad \mathbf{P}^{\{2\}} = 4 \begin{bmatrix} p \\ I_2p - 2\Psi_{,I_1} - 2I_1\Psi_{,I_2} \\ 2\Psi_{,I_2} \\ 0 \\ -2\Psi_{,J_1} \\ -4\Psi_{,J_2} \end{bmatrix}, \quad (\text{S9})$$

$$\mathbf{Q}^{\{1\}}_{\{1\}} = \mathbf{Q}^{\{1\}}_{\{2\}} = \mathbf{Q}^{\{2\}}_{\{1\}} = \mathbf{Q}^{\{2\}}_{\{2\}} = \mathbf{0}. \quad (\text{S10})$$

The other matrices in Eq.(S7) have cumbersome expressions and will be not reported here for the sake of brevity. In summary, Eqs (S7) and (S8) represent respectively 6 and 3 scalar equations, respectively, determining the ISS conditions, the unknowns being the scalar functions  $\Psi$ ,  $p$  and  $p_\tau$ .

For the sake of simplicity, we now look for simplified expression neglecting the functional dependence on  $J_3$  and  $J_4$ , which represent higher order terms in the mixed functional dependence. In this case, the fourth scalar equation of Eq. (S7) rewrites:

$$-8\Psi_{,J_2}\Psi_{,J_1}^\sigma = 0 \quad (\text{S11})$$

which is only possible, for every  $\mathbf{F}$  and  $\boldsymbol{\tau}$ , if and only if  $\Psi$  does not depend on  $J_2$  or on  $J_1$ . In particular, if  $\Psi$  does not depend also on  $J_2$ , then Eq. (S7) reduces to:

$$4\Psi_{,J_1}\Psi_{,J_1}^\sigma = 1, \quad \frac{\Psi_{,I_2}^\sigma}{\sqrt{\Psi_{,J_1}^\sigma}} + \frac{\Psi_{,I_2}}{\sqrt{\Psi_{,J_1}}} = 0, \quad p\Psi_{,J_1}^\sigma = \Psi_{,I_1}^\sigma, \quad p_\tau\Psi_{,J_1} = \Psi_{,I_1}, \quad (\text{S12})$$

where we have used Eq. (S12)<sub>1</sub> to derive the other three equations. Let us now impose the physical compatibility of the strain energy, by letting  $\mathbf{F} = \mathbf{I}$ ,  $\boldsymbol{\sigma} = \boldsymbol{\tau}$  and  $p_\tau = p$ . We obtain that  $\Psi_{,J_1} = 1/2$ ,  $2\Psi_{,J_1} = p$  and  $\Psi_{,I_2} = 0$  for  $\mathbf{F} = \mathbf{I}$ . Accordingly, we derive the class of free energies for residually stressed material expressed by Eq.(5) in our Letter. The generalization to incompressible neo-Hookean materials in Eq.(6) in our Letter is straightforward, thanks to the possibility to invert explicitly its constitutive relation in order to write the strain as a function of the Cauchy stress [1]. Finally, the proposed approach and the initial stress symmetry condition are also valid for compressible materials, with minor alterations introduced by the chosen functional dependence on  $I_{C3} = \det\mathbf{C}$ .

### 3 Optimal solution for the Cauchy stress within an artery

The variational problem determining the optimal distribution of the Cauchy stress in an artery under internal pressure rewrites:

$$\delta\mathcal{L} = \delta \int_{r_i}^{r_o} [\sigma_{rr,r}^2 + (r\sigma_{rr})_{,rr}^2] dr = 0 \quad (\text{S13})$$

under the constraint  $\int_{r_i}^{r_o} \sigma_{rr,r} dr = P$  given by the boundary conditions. Before solving the corresponding Euler-Lagrange equations, let us introduce the following dimensionless

variables:

$$\varrho = \frac{r - r_i}{r_o - r_i} \quad \text{and} \quad \varsigma(\rho) = \frac{\sigma_{rr}(r)}{P}, \quad (\text{S14})$$

so that

$$\sigma_{rr,r} = \varsigma' \frac{P}{r_o - r_i}, \quad \sigma_{rr,rr} = \varsigma'' \frac{P}{r_o - r_i^2} \quad (\text{S15})$$

and

$$\sigma_{\theta\theta,r} = \frac{P}{r_o - r_i} (2\varsigma' + (\rho + \alpha)\varsigma'') \quad (\text{S16})$$

where we have introduced  $\alpha = r_i/(r_o - r_i)$ . The functional  $\mathcal{L}$  in Eq.(S13) therefore rewrites :

$$\mathcal{L} = \frac{P^2}{r_i^2} \alpha^2 \int_0^1 [(\varsigma')^2 + (2\varsigma' + (\varrho + \alpha)\varsigma'')^2] d\varrho \quad (\text{S17})$$

with the constraint

$$\varsigma(1) = 0 \quad \text{and} \quad \varsigma(0) = -1 \implies \int_0^1 \varsigma' d\varrho = 1. \quad (\text{S18})$$

Using the calculus of variations [2], we find the following Euler-Lagrange equation

$$\frac{\partial f}{\partial \varsigma'} - \frac{d}{d\varrho} \frac{\partial f}{\partial \varsigma''} = \Lambda \quad \text{for } \varrho \in (0, 1) \quad \text{and} \quad \frac{\partial f}{\partial \varsigma''} = 0 \quad \text{for } \varrho = 0, 1 \quad (\text{S19})$$

where

$$f = (\varsigma')^2 + (2\varsigma' + (\varrho + \alpha)\varsigma'')^2 \quad (\text{S20})$$

and  $\Lambda$  is a Lagrange multiplier that appears due to the constraint (S18). The solution of (S19) is given by

$$\begin{aligned} \varsigma' = & \frac{\Lambda}{6} - \frac{\Lambda}{6} (\sqrt{13} - 3) \frac{\alpha^{\frac{\sqrt{13}}{2} + \frac{1}{2}} - (1 + \alpha)^{\frac{\sqrt{13}}{2} + \frac{1}{2}}}{\alpha^{\sqrt{13}} - (1 + \alpha)^{\sqrt{13}}} (\alpha + \varrho)^{\frac{\sqrt{13}}{2} + \frac{1}{2}} \\ & + \frac{2\Lambda}{3(\sqrt{13} - 3)} \frac{\alpha^{\frac{\sqrt{13}}{2} - \frac{1}{2}} - (1 + \alpha)^{\frac{\sqrt{13}}{2} - \frac{1}{2}}}{\alpha^{\sqrt{13}} - (1 + \alpha)^{\sqrt{13}}} \left( \frac{\alpha(1 + \alpha)}{\alpha + \varrho} \right)^{\frac{\sqrt{13}}{2} + \frac{1}{2}} \end{aligned} \quad (\text{S21})$$

Finally, we determine  $\Lambda$  from the constraint (S18) to be

$$\Lambda = 6 \left( \int_0^1 1 - (\sqrt{13} - 3) \frac{\alpha^{\frac{\sqrt{13}+1}{2}} - (1+\alpha)^{\frac{\sqrt{13}+1}{2}}}{\alpha^{\sqrt{13}} - (1+\alpha)^{\sqrt{13}}} (\alpha + \varrho)^{\frac{\sqrt{13}+1}{2}} + \frac{4}{\sqrt{13} - 3} \frac{\alpha^{\frac{\sqrt{13}-1}{2}} - (1+\alpha)^{\frac{\sqrt{13}-1}{2}}}{\alpha^{\sqrt{13}} - (1+\alpha)^{\sqrt{13}}} \left( \frac{\alpha(1+\alpha)}{\alpha + \varrho} \right)^{\frac{\sqrt{13}+1}{2}} d\varrho \right)^{-1}. \quad (\text{S22})$$

Finally, we compare our optimal solution for the Cauchy stress against the one obtained using an opened ring as virtual state, also known as the *opening angle method* [3], as depicted in Figure 1.

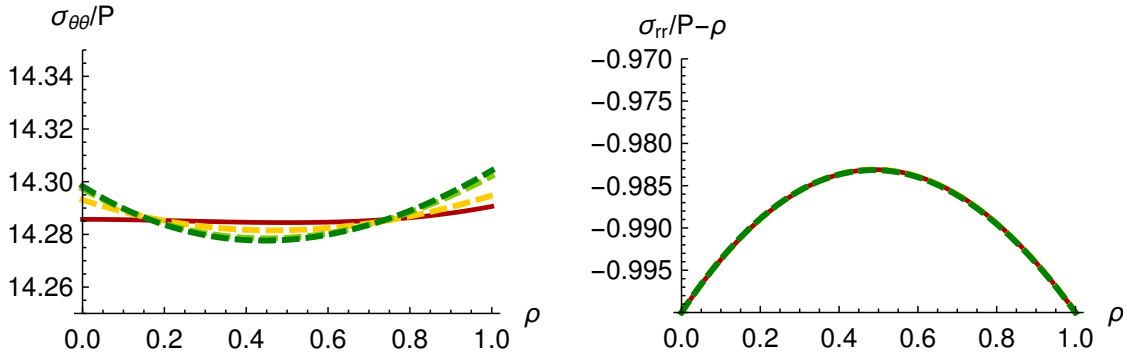

Figure 1: The curves of the dimensionless Cauchy stress against the dimensionless radius  $\rho$  for the opening angle method (dashed lines) and our optimal stress (red solid lines). We set physically relevant parameters for the descending thoracic aorta:  $r_i = 20$  mm,  $r_o = 21.4$  mm, so that  $\alpha^{-1} = 0.07$ . As the dashed curves shade from yellow to green  $P/\mu$  goes through the values 0.05, 0.2 and 0.35 with optimal opening angle  $\phi = 65.9^\circ$ ,  $204.2^\circ$  and  $261.723^\circ$ ; stress free reference inner radius 20.3 mm, 25.2 mm and 31.1 mm; and stress free reference outer radius 22 mm, 27.8 mm and 34.4 mm respectively.

We highlight that  $\sigma_{\theta\theta}$  for the opening angle method tends to the optimal stress  $\sigma_{\theta\theta}$  only if  $P/\mu$  tends to zero, while the plots for  $\sigma_{rr}$  do not show significant differences between the two methods.

## Wave propagation in a residually stressed tube

Let us deal with the infinitesimal wave propagation of an undeformed tubular tissue with residual stresses. We consider an inhomogeneous infinitesimal wave  $\mathbf{u}$  of the form:

$$\mathbf{u} = u(R, \Theta, t)\mathbf{e}_R + v(R, \Theta, t)\mathbf{e}_\Theta, \quad (\text{S23})$$

where  $\mathbf{E}_R$  and  $\mathbf{E}_\Theta$  are the radial and tangential unit vectors, so that  $u$ ,  $v$  represent the incremental radial and hoop displacement fields, respectively. Indicating with  $\mathbf{\Gamma} = \text{Grad } \mathbf{u}$  the spatial displacement gradient associated with the incremental deformation, the incremental incompressibility condition reads:

$$\text{tr } \mathbf{\Gamma} = 0 \quad (\text{S24})$$

Following the incremental elastic theory [4], the incremental equations of motion read:

$$\text{Div } \mathbf{s} = \rho \frac{\partial^2 \mathbf{u}}{\partial t^2} \quad (\text{S25})$$

with boundary conditions  $\mathbf{e}_R \mathbf{s} = 0$  at the inner and outer radii,  $R_i$  and  $R_o$ , respectively. The components of the incremental nominal stress  $\mathbf{s}$  for the constitutive theory in Eq.(5) of the article read:

$$s_{ij} = \lambda_\tau (\Gamma_{ji} + \Gamma_{ij}) + \tau_{ik} \Gamma_{jk} - q_\tau \delta_{ij}, \quad (\text{S26})$$

where  $q_\tau$  is the incremental pressure, and  $\lambda_\tau$  is the real root of  $\lambda^2 + \lambda I_{\tau_1} + I_{\tau_3} - \mu^2 = 0$ , which is the equivalent of Eq.(6) of the article in plane strain conditions.

Let us now make an educated guess of the solution in the form of a time-harmonic cylin-



drical wave, having displacement and stress components defined as:

$$\begin{aligned} [u, s_{RR}, q_\tau] &= [U(R), S_{RR}(R), Q(R)] \cos(m\Theta - \omega t), \\ [v, s_{R\Theta}] &= [V(R), S_{R\Theta}(R)] \sin(m\Theta - \omega t), \end{aligned} \quad (\text{S27})$$

where  $m$  is the integer angular wavenumber,  $\omega$  is the angular frequency, and the amplitudes  $U, V, S_{RR}, S_{R\Theta}, Q$  are scalar functions of  $R$  only. Following [5], the incompressibility condition Eq.(S24) and the equation of motion Eq.(S25) can be recast in a system of four ordinary differential equation of the first order:

$$\frac{d}{dR} \begin{bmatrix} \mathbf{U} \\ R\mathbf{S} \end{bmatrix} = \frac{1}{R} \begin{bmatrix} \mathbf{G}_1 & \mathbf{G}_2 \\ \mathbf{G}_3 & -\mathbf{G}_1^T \end{bmatrix} \begin{bmatrix} \mathbf{U} \\ R\mathbf{S} \end{bmatrix} \quad \text{with} \quad \begin{cases} \mathbf{U} = [U(R), V(R)]^T, \\ \mathbf{S} = [S_{RR}(R), S_{R\Theta}(R)]^T, \end{cases} \quad (\text{S28})$$

also known as the Stroh formulation of the incremental problem. The sub-blocks of the Stroh matrix in Eq.(S28) have the following components

$$\begin{aligned} \mathbf{G}_1 &= \begin{bmatrix} -1 & -m \\ \frac{mR\lambda_\tau}{f+R\lambda_\tau} & \frac{\lambda_\tau}{\tau_{RR}+\lambda_\tau} \end{bmatrix}, & \mathbf{G}_2 &= \begin{bmatrix} 0 & 0 \\ 0 & \frac{1}{\tau_{RR}+\lambda_\tau} \end{bmatrix}, \\ \mathbf{G}_3 &= \begin{bmatrix} 4\lambda_\tau - \rho R^2 \omega^2 + (1+m^2)\tau_{\Theta\Theta} + \frac{\tau_{RR}[\tau_{RR}+(1+m^2)\lambda_\tau]}{\tau_{RR}+\lambda_\tau} & m \left[ 4\lambda_\tau + 2\tau_{\Theta\Theta} + \frac{\tau_{RR}(\tau_{RR}+2\lambda_\tau)}{\tau_{RR}+\lambda_\tau} \right] \\ m \left[ 4\lambda_\tau + 2\tau_{\Theta\Theta} + \frac{\tau_{RR}(\tau_{RR}+2\lambda_\tau)}{(\tau_{RR}+\lambda_\tau)} \right] & 4m^2\lambda_\tau + (1+m^2)I_{\tau 1} - \frac{\tau_{RR}^2}{(\tau_{RR}+\lambda_\tau)} - \rho R^2 \omega^2 \end{bmatrix}, \end{aligned} \quad (\text{S29})$$

Let us now introduce a functional relation between the incremental traction and the displacements vectors as  $R\mathbf{S}(R) = \mathbf{Z}(R)\mathbf{U}(R)$ , where  $\mathbf{Z}$  is a *surface impedance matrix* [6]. Substituting the previous expression into Eq.(S28), we derive the following differential Riccati equation for  $\mathbf{Z}$ ,

$$\frac{d}{dR}\mathbf{Z} = \frac{1}{R} (\mathbf{G}_3 - \mathbf{G}_1^T\mathbf{Z} - \mathbf{Z}\mathbf{G}_1 - \mathbf{Z}\mathbf{G}_2\mathbf{Z}), \quad (\text{S30})$$

Let us now clarify how Eq.(S30) can be used to establish a non-destructive method for measuring the residual stress distribution within a pre-stressed tube. An illustrative example is sketched in the following. Imposing the equilibrium equations in the undeformed configuration, a simple expression of residual stress distribution is given by:

$$\tau_{RR} = \alpha(R - R_i)(R_o - R)/R_i^2; \quad \tau_{\Theta\Theta} = (R\tau_{RR})_{,R} \quad (\text{S31})$$

Using the stress-free boundary conditions and the functional form in Eq.(S31) it is possible to numerically integrate Eq. (S30) from the initial condition  $\mathbf{Z} = \mathbf{Z}(R_i) = \mathbf{0}$  (resp.  $\mathbf{Z} = \mathbf{Z}(R_o) = \mathbf{0}$ ), proving the existence of a time-harmonic cylindrical wave when the target condition  $\det \mathbf{Z}(R_o) = \mathbf{0}$  (resp.  $\det \mathbf{Z}(R_i) = \mathbf{0}$ ) is met.

The Hamiltonian structure and algebraic properties of the Stroh matrix yield a robust numerical procedure to determine when cylindrical waves appear on either of the faces of the residually stressed tube. In particular, we found the unique, symmetric, semi-definite solution of the differential Riccati equation for  $\mathbf{Z}$  in Eq.(S30) by numerical integration using the software *Mathematica* (Wolfram Inc., version 10.1, Champaign, IL) once  $\tau_{RR}$ ,  $\omega$ ,  $R_o$  and  $R_i$  are prescribed. Thus, for a given tube, we adjust the pre-stress parameter  $\alpha/\mu$ , proportional to the amplitude of the residual stress, until we meet the target condition for a given  $m$ . Once  $\alpha/\mu$  is determined, we integrate the first line of Eq.(S28), i.e.

$$\frac{d\mathbf{U}}{dR} = \frac{1}{R}\mathbf{G}_1\mathbf{U} + \frac{1}{R}\mathbf{G}_2\mathbf{Z}\mathbf{U}, \quad (\text{S32})$$

simultaneously with Eq.(S30) to compute the incremental wave field throughout the thickness of the tube wall.

## References

- [1] Destrade, M, Murphy, JG and Saccomandi, G. 2012. *Simple shear is not so simple*. Int J Nonlinear Mech 47(2), 210-214
- [2] Dacorogna, B. *Direct methods in the calculus of variations*. Springer Science & Business Media, 2007.
- [3] Chuong, CJ and Fung, YC. 1986. *Residual Stress in Arteries*. In: *Frontiers in Biomechanics*,117-129.
- [4] Ogden, R.W. 1997. *Nonlinear elastic deformations*. Dover Publications.
- [5] Shuvalov,A.L. 2003. *A sextic formalism for threedimensional elastodynamics of cylindrically anisotropic radially inhomogeneous materials*. Proceedings of the Royal Society of London A: Mathematical, Physical and Engineering Sciences 459, 2035: 1611-1639, 2003.
- [6] Biryukov,S.V. 1985. *Impedance method in the theory of elastic surface wave*. Sov. Phys. Acoust. 31: 350354.
